# Supplementary material for: Violating the normality assumption may be the lesser of two evils
Source: PubMed Central journal article supplement (PMC8613103; doi:10.3758/s13428-021-01587-5), 2021-05-07
Supplement: 13428_2021_1587_MOESM1_ESM.pdf [file 13428_2021_1587_MOESM1_ESM.pdf]

# SUPPLEMENTARY MATERIAL

## Violating the normality assumption may be the lesser of two evils

Ulrich Knief<sup>1,\*</sup> & Wolfgang Forstmeier<sup>2</sup>

<sup>1</sup> Division of Evolutionary Biology, Faculty of Biology, Ludwig Maximilian University of Munich, 82152 Planegg-Martinsried, Germany

<sup>2</sup> Department of Behavioural Ecology and Evolutionary Genetics, Max Planck Institute for Ornithology, 82319 Seewiesen, Germany

\* Address for correspondence: Ulrich Knief, Division of Evolutionary Biology, Faculty of Biology, Ludwig Maximilian University of Munich, Grosshaderner Str. 2, 82152 Planegg-Martinsried, Germany, Phone: 0049-89-2180-74101, Fax: 0049-89-2180-74104, E-mail: [knief@biologie.uni-muenchen.de](mailto:knief@biologie.uni-muenchen.de)

### Index

|                              |           |
|------------------------------|-----------|
| <b>Supplementary Methods</b> | <b>2</b>  |
| <b>Supplementary Figures</b> | <b>9</b>  |
| <b>Supplementary Tables</b>  | <b>16</b> |
| <b>References</b>            | <b>23</b> |

# 1 **Supplementary Methods**

## 3 **Description of the TrustGauss functions**

4 The main function of the “TrustGauss” package is TrustGauss() and it can take 29 arguments that are  
5 described in the documentation to the function and that can be accessed via

```
6  
7 > ?TrustGauss
```

8  
9 TrustGauss() can be used to assess type I error rates of linear regression models that are fitted through  
10 a call to the base R function glm(). We here briefly summarize each of the 29 arguments. Default  
11 settings for each argument are given in the documentation to the function.  
12

- 13 1. **Family**. This argument takes a character input and specifies the error distribution and link  
14 function to be used in the generalized linear model. It can take one of the following values:  
15 “gaussian”, “poisson”, “binomial”, “quasipoisson”, “quasibinomial” or “Gamma”. Since the  
16 argument is passed directly to the glm() function, the link function can be specified in the standard  
17 way, for example as “gaussian(link = ‘identity’)”. See also the glm() function for further details.
- 18 2. **nSamples**. This argument takes a numeric integer input, specifying the number of samples/data  
19 points to simulate.
- 20 3. **nSimulations**. This argument takes a numeric integer input, specifying for how many iterations  
21 the simulation will run.
- 22 4. **SaveAllOutput**. This argument is Boolean. If it is set to TRUE, all individual data points of the  
23 dependent and independent variables are returned in a list. They can be found in “Data” with  
24 column names “Dependent”, “Cov1”, “Cov2”, ..., “Fac1”, “Fac2”, ... (depending on what  
25 combination of covariates and factors is specified, see below).
- 26 5. **CompareTtest**. This argument is Boolean. If it is set to TRUE, *P*-values are calculated through  
27 both the glm() and the t.test() function. This is only valid when a single factor with two levels is  
28 fitted as the independent variable with distribution set to “UniformCategorical” (see below).
- 29 6. **PlotExample**. This parameter is Boolean. If it is set to TRUE, one example histogram of the  
30 distribution of the dependent variable *Y* is plotted.
- 31 7. **DistributionY**. This argument takes a character input and specifies the distribution of the  
32 dependent variable *Y*. It can take one of the following values: “Gaussian”, “GaussianCategorical”,  
33 “GaussianZero”, “AbsoluteGaussian”, “Gamma”, “GammaCategorical”,  
34 “GaussianZeroCategorical”, “Binomial”, “NegativeBinomial”, “StudentsT”, “Poisson” or  
35 “Uniform”. In principle, the base R functions for generating randomly distributed Gaussian  
36 [rnorm()], Gamma [rgamma()], binomial [rbinom()], negative binomial [rnbinom()], Student’s *t*  
37 [rt()], Poisson [rpois()] or uniform [runif()] variables are used. Parameters for all distributions can  
38 be specified (see below). “GaussianCategorical” generates normally distributed integers.  
39 “GaussianZero” generates a zero-inflated normal distribution. “AbsoluteGaussian” simulates  
40 absolute values of a Gaussian distribution. “GaussianZeroCategorical” first generates a zero-  
41 inflated normal distribution and then produces categories. “GammaCategorical” generates gamma  
42 distributed integers.
- 43 8. **DistributionXCov**. This argument takes a character input and specifies the distribution of the  
44 independent covariate *X*. It can take the same values as DistributionY. It is also possible to specify  
45 multiple different distributions in order to fit more than one covariate (as a vector). Additionally, it  
46 can be set to NULL if only factors should be fitted.

47 9. `DistributionXFac`. This argument takes a character input and specifies the distribution of the  
48 independent factor  $X$ . Only the categorical distributions are valid inputs (“GaussianCategorical”,  
49 “GammaCategorical”, “GaussianZeroCategorical”, “Binomial” or “UniformCategorical”). It is  
50 also possible to specify multiple different distributions in order to fit more than one factor (as a  
51 vector). Additionally, it can be set to NULL if only covariates should be fitted.  
52

53 The following arguments specify parameters for the distributions of the independent and dependent  
54 variables.  
55

56 10. `MeanY.gauss`. This argument takes a numeric input, specifying the mean of the distribution of  
57  $Y$ , if `DistributionY` is set to “Gaussian”, “GaussianCategorical”, “GaussianZero”,  
58 “GaussianZeroCategorical” or “AbsoluteGaussian”. See also the `rnorm()` function for further  
59 details. The operations of categorization, taking the absolute value or adding zero-inflation are  
60 performed after the call to the `rnorm()` function.

61 11. `SDY.gauss`. This argument takes a numeric input, specifying the standard deviation of the  
62 distribution of  $Y$ , if `DistributionY` is set to “Gaussian”, “GaussianCategorical”, “GaussianZero”,  
63 “GaussianZeroCategorical” or “AbsoluteGaussian”. See also the `rnorm()` function for further  
64 details. The operations of categorization, taking the absolute value or adding zero-inflation are  
65 performed after the call to the `rnorm()` function.

66 12. `nCategoriesY.cat`. This argument takes a numeric integer input, specifying how many  
67 categories are simulated, if `DistributionY` is set to “GaussianCategorical” or “GammaCategorical”.

68 13. `zeroLevelY.zero`. This argument takes a numeric input, specifying the proportion of data that  
69 will be set to 0, if `DistributionY` is set to “GaussianZero” or “GaussianZeroCategorical”.

70 14. `ShapeY.gamma`. This argument takes a numeric input, specifying the shape parameter  $k$ , if  
71 `DistributionY` is set to “Gamma”, “GammaCategorical” or “NegativeBinomial”. See also the  
72 `rgamma()` and `rbinom()` functions for further details. Categorization is performed after the call to  
73 the `rgamma()` function.

74 15. `ScaleY.gamma`. This argument takes a numeric input, specifying the scale parameter capital  
75  $\theta$ , if `DistributionY` is set to “Gamma”, “GammaCategorical” or “NegativeBinomial”. See also  
76 the `rgamma()` and `rbinom()` functions for further details. Categorization is performed after the call  
77 to the `rgamma()` function.

78 16. `DFY.student`. This argument takes a numeric input, specifying the degrees of freedom, if  
79 `DistributionY` is set to “StudentsT”. See also the `rt()` function for further details.

80 17. `MinY.uni`. This argument takes a numeric input, specifying the minimum of the distribution, if  
81 `DistributionY` is set to “Uniform”. See also the `runif()` function for further details.

82 18. `MaxY.uni`. This argument takes a numeric input, specifying the maximum of the distribution, if  
83 `DistributionY` is set to “Uniform”. See also the `runif()` function for further details.

84 19. `LambdaY.pois`. This argument takes a numeric input, specifying the mean of the distribution, if  
85 `DistributionY` is set to “Poisson”. See also the `rpois()` function for further details.

86 20. `MeanX.gauss`. This argument takes a numeric input, specifying the mean of the distribution of  
87 the independent variable  $X$ , if `DistributionX` is set to “Gaussian”, “GaussianCategorical”,  
88 “GaussianZero”, “GaussianZeroCategorical” or “AbsoluteGaussian”. See also the `rnorm()` function  
89 for further details. See also the `rnorm()` function for further details. The operations of  
90 categorization, taking the absolute value or adding zero-inflation are performed after the call to the  
91 `rnorm()` function.

92 21. `SDX.gauss`. This argument takes a numeric input, specifying the standard deviation of the  
93 distribution of the independent variable  $X$ , if `DistributionX` is set to “Gaussian”,

94 “GaussianCategorical”, “GaussianZero”, “GaussianZeroCategorical” or “AbsoluteGaussian”. See  
95 also the `rnorm()` function for further details. See also the `rnorm()` function for further details. The  
96 operations of categorization, taking the absolute value or adding zero-inflation are performed after  
97 the call to the `rnorm()` function.

98 22. `nCategoriesX.cat`. This argument takes a numeric integer input, specifying how many  
99 categories are simulated, if `DistributionX` is set to “GaussianCategorical” or “GammaCategorical”.

100 23. `zeroLevelX.zero`. This argument takes a numeric input, specifying the proportion of data that  
101 will be set to 0, if `DistributionX` is set to “GaussianZero” or “GaussianZeroCategorical”.

102 24. `ShapeX.gamma`. This argument takes a numeric input, specifying the shape parameter  $k$ , if  
103 `DistributionX` is set to “Gamma”, “GammaCategorical” or “NegativeBinomial”. See also the  
104 `rgamma()` and `rbinom()` functions for further details. Categorization is performed after the call to  
105 the `rgamma()` function.

106 25. `ScaleX.gamma`. This argument takes a numeric input, specifying the scale parameter capital  
107  $\theta$ , if `DistributionX` is set to “Gamma”, “GammaCategorical” or “NegativeBinomial”. See also  
108 the `rgamma()` and `rbinom()` functions for further details. Categorization is performed after the call  
109 to the `rgamma()` function.

110 26. `DFX.student`. This argument takes a numeric input, specifying the degrees of freedom, if  
111 `DistributionX` is set to “StudentsT”. See also the `rt()` function for further details.

112 27. `MinX.uni`. This argument takes a numeric input, specifying the minimum of the distribution, if  
113 `DistributionX` is set to “Uniform”. See also the `runif()` function for further details.

114 28. `MaxX.uni`. This argument takes a numeric input, specifying the maximum of the distribution, if  
115 `DistributionX` is set to “Uniform”. See also the `runif()` function for further details.

116 29. `LambdaX.pois`. This argument takes a numeric input, specifying the mean of the distribution, if  
117 `DistributionX` is set to “Poisson”. See also the `rpois()` function for further details.

118

119 The function `TrustGaussTypeII()` can be used for the analysis of type II error rates as described in the  
120 main text. It adds a predefined effect to a single covariate only. All arguments can be accessed via  
121

122 `> ?TrustGaussTypeII`

123

124 The function takes all the above 29 arguments of the `TrustGauss()` function and two additional ones.

125

126 30. `EffectXCov`. This argument takes a numeric input, specifying the effect size that should be  
127 simulated.

128 31. `ZTransform`. This argument is Boolean. If it is set to `TRUE`, the distributions of the dependent  
129 variable  $Y$  and the independent variable  $X$  are Z-transformed prior to adding the effect specified via  
130 `EffectXCov`.

131

132 The function `TrustGaussLMM()` can be used to fit linear mixed-effects models and to assess type I  
133 error rates. It takes the above 29 arguments of the `TrustGauss()` function. Furthermore, a single  
134 random effect can be specified via

135

136 32. `RanEF`. This argument is Boolean. If it is set to `TRUE`, a single random effect is fitted.

137 33. `nRanEFLevels`. This argument takes a numeric integer input, specifying how many repeated  
138 measures for each sampling points are generated.

139 34. `RanEFVarExp`. This argument takes a numeric input, specifying the amount of variance  
140 explained by the random effect. This amount is only correct if the variables are normally  
141 distributed.  
142

143 The three functions in `TrustGauss` return a list with at least five elements  
144

- 145 1. A data frame `Pvals` with all  $P$ -values of covariates and factors. It has as many rows as simulation  
146 runs (`nSimulations`) and as many columns as fitted covariates and factors. Each row represents the  
147  $P$ -values of a single iteration. Column names are of the form “PCov1”, “PCov2”, ..., “PFac1”,  
148 “PFac2”, ... (depending on what combination of covariates and factors is specified). If  
149 `CompareTtest` was set to `TRUE`, a two column data frame is returned with columns “PFac1” and  
150 “PTtest”. The second column represents the  $P$ -values of a  $t$ -test.
- 151 2. A data frame `ResCCC`. It has as many rows as simulation runs (`nSimulations`) and six columns.  
152 Each row represents the following estimates of a single iteration: Column “PSWY” contains all  $P$ -  
153 values of a Shapiro-Wilk test for normality of the dependent variable  $Y$ , column “PSWRes”  
154 contains all  $P$ -values of a Shapiro-Wilk test for normality of the residuals, column “rho” contains  
155 the concordance correlation coefficient (Lin 1989) between observed and expected residuals  
156 assuming normality for each model. We use the `qqnorm()` function to generate the expected values.  
157 Columns “s.shift”, “l.shift” and “C.b” contain the scale shift, the location shift and the bias  
158 correction factor of the concordance correlation (Lin 1989). We use the `CCC()` function of the  
159 `DescTools` R package (v0.99.25; Signorell & mult. al. 2018) for estimating these parameters.
- 160 3. A vector `Alphas .05` that contains the type I error rate at an  $\alpha$ -level of 0.05 for each of the fitted  
161 covariates and factors summarized across all simulation runs.
- 162 4. A vector `Alphas .001` that contains the type I error rate at an  $\alpha$ -level of 0.001 for each of the  
163 fitted covariates and factors summarized across all simulation runs.
- 164 5. A data frame `ShapiroWilk`, which is a summary of the data frame `ResCCC` with one row and  
165 six columns. Column “Mean.PSWR” contains the mean  $P$ -value of the Shapiro-Wilk tests for  
166 normality of the residuals, calculated as  
167  
168 
$$10^{\text{mean}(\log_{10}(\text{ResCCC}\$PSWRes))}$$
169  
170 Columns “QL.PSWR” and “QU.PSWR” provide the lower and upper 95% quantiles of the  $P$ -  
171 values of the Shapiro-Wilk tests for normality of the residuals. Column “Mean.PSWY” contains  
172 the mean  $P$ -value of the Shapiro-Wilk tests for normality of the dependent variable  $Y$ , calculated as  
173  
174 
$$10^{\text{mean}(\log_{10}(\text{ResCCC}\$PSWY))}$$
175  
176 Columns “QL.PSWY” and “QU.PSWY” provide the lower and upper 95% quantiles of the  $P$ -  
177 values of the Shapiro-Wilk tests for normality of the dependent variable.  
178
- 179 6. If the argument `SaveAllOutput` is set to `TRUE`, a list `Data` that contains as many data frames as  
180 there are dependent and independent variables fitted. The data frames are named “Dependent”,  
181 “Cov1”, “Cov2”, ... “Fac1”, “Fac2”, ... (depending on what combination of covariates and factors  
182 is specified). In each of these data frames the values of  $Y$  (Dependent) and  $X$  (all the other data  
183 frames) are stored. Each of these data frames has as many rows as simulation runs (`nSimulations`)  
184 and as many columns as the specified sample size (`nSamples`). Each row represents the data values  
185 of a single iteration.

186  
187 The function `TrustGaussTypeII()` returns one more element  
188  
189 7. A data frame `Effects` with the parameter estimates of the covariate with an added effect. It has as  
190 many rows as simulation runs (`nSimulations`) and three columns. Each row represents the  
191 parameter estimates of a single iteration. Column “Intercept” contains the estimate of the intercept,  
192 column “Estimate” contains the slope estimate and column “SE” the standard error of the slope  
193 estimate.

194  
195 The function `TrustGaussLMM()` returns the same list as the `TrustGauss()` function with one additional  
196 element

197  
198 8. A vector `VarExp` that contains the proportion of variance explained by the single random effect  
199 fitted in the mixed-effects model. Each element of the vector corresponds to a single iteration.  
200 Thus, it has as many elements as simulation runs (`nSimulations`).

### 201 202 **Description of the data generating functions**

203 All of the above three functions in the `TrustGauss` package generate data for the dependent variable  $Y$   
204 and the independent variable  $X$  through calls to the base R functions `rnorm()`, `rgamma()`, `rbinom()`,  
205 `rnbinom()`, `rt()`, `rpois()`, `runif()` and `sample()`. These functions draw random values with specified  
206 parameter arguments from a Gaussian, Gamma, binomial, negative binomial, Student’s  $t$ , Poisson,  
207 uniform (floating numbers) or uniform (integers) distribution, respectively. The distributions  
208 “GaussianCategorical”, “GaussianZero”, “GaussianZeroCategorical”, “AbsoluteGaussian” and  
209 “GammaCategorical” make use of additional functions to generate categories, to take absolute values  
210 or to introduce zero-inflation after a call to `rnorm()` or `rgamma()`, thereby changing the specified mean  
211 and standard deviation or shape and scale. Table 1 lists the specific parameter settings for the ten  
212 distributions simulated in the main text (D0–D9). Figures 1A and S2A display histograms of the  
213 distributions D0–D9.

### 214 215 **A typical call to TrustGauss()**

216 Assume we want to run a simulation with 100 observations in each of 50,000 iterations. We specify  
217 the `Family` argument as “Gaussian” to fit a linear model with identity link. See the `glm()`  
218 documentation for details on the `Family` arguments. This is equivalent to fitting a linear model  
219 assuming normally distributed errors. Since we might also be interested in the individual observations  
220 of each simulation run, we specify `SaveAllOutput=TRUE`. This will save the  $100 \times 50,000 =$   
221  $5,000,000$  data points of the dependent variable  $Y$  and the  $5,000,000$  observations of the predictor  $X$ .  
222 We want the dependent variable  $Y$  to be distributed as the absolute values of a Gaussian distribution  
223 with mean 0 and standard deviation 1. The independent variable  $X$  should be a single covariate that is  
224 Gamma distributed with shape 1.5 and scale 10. Thus, our call to `TrustGauss()` looks like this

```
225  
226 > sim <- TrustGauss(Family="gaussian", nSamples=100,  
227   nSimulations=50000, SaveAllOutput=TRUE,  
228   DistributionY="AbsoluteGaussian", DistributionXCov="Gamma",  
229   DistributionXFac=NULL, MeanY.gauss=0, SDY.gauss=1,  
230   ShapeX.gamma=1.5, ScaleX.gamma=10)
```

231  
232 A progress bar is going to indicate the progress of the simulation, which is updated after every  
233 iteration. As soon as the simulation has finished, we can access every element of the resulting list. For

234 example, if we want to obtain the data frame of individual  $P$ -values for every iteration in this call to  
235 TrustGauss(), we can access it via

```
236  
237 > sim$Pval
```

238  
239 A summary of the type I error rate at an  $\alpha$ -level of 0.05 is accessible through

```
240  
241 > sim$Alphas.05
```

242  
243 In this call to TrustGauss() with a single covariate, this will yield only a single value for the  
244 independent variable  $X$ . If we had multiple covariates or factors specified, a separate type I error rate  
245 for each of them would have been displayed.

### 246 **Description of the basic simulations**

247 After specifying the input arguments for the TrustGauss()function (see above), the simulation starts  
248 by generating uncorrelated data for the dependent variable  $Y$  and the independent variable  $X$  according  
249 to the input parameters. Following our above example, specifying a sample size of  $n_{\text{Samples}} = 100$   
250 and the distribution of  $Y$  as Distribution $Y =$  “AbsoluteGaussian” with Mean $Y.gauss = 0$  and  
251 SD $Y.gauss = 1$ , the function generates data for  $Y$  as

```
252  
253  
254 > y <- abs(rnorm(n=100, mean=0, sd=1))
```

255  
256 Similarly, for the independent variable  $X$  we specify Distribution $X =$  “Gamma” with Shape $X.gamma$   
257  $= 1.5$  and Scale $X.gamma = 10$ . Then, the function generates data for  $X$  as

```
258  
259 > x <- rgamma(n=100, shape=1.5, scale=10)
```

260  
261 After the data generating step, two linear models are fitted using the Family argument (argument 1)  
262 from above

```
263  
264 > mod1 <- glm(y ~ x, family=Family)  
265 > mod2 <- glm(y ~ 1, family=Family)
```

266  
267 The models are compared via

```
268  
269 > anova(mod1, mod2)
```

270  
271 We keep the  $P$ -value of this model comparison and start the next iteration by generating data for  $Y$   
272 and  $X$  again. The number of iterations was set to  $n_{\text{Simulations}} = 50,000$  in all our simulations. We  
273 further set Family = “gaussian”, with the exception of models with a Poisson error structure that are  
274 highlighted as such in the main text.

275  
276 Because the data for  $Y$  and  $X$  are uncorrelated, we expect 5% of all models to yield a  $P$ -value  $\leq 0.05$ .  
277 If more than 5% of all models have a  $P$ -value  $\leq 0.05$ , then the type I error rate is inflated (i.e. too  
278 many models yield “significant” results), whereas if less models have a  $P$ -value  $\leq 0.05$ , then they are  
279 conservative, yielding too few “significant” results. In Figure 1, combinations of  $Y$  and  $X$  that produce  
280 inflated type I error rates are coloured red and those yielding conservative  $P$ -values are coloured blue.

281

282 **Introduction of heteroscedasticity**

283 First, we sampled the independent variable  $X$  from a binomial distribution, where we varied the  
284 success rate from 0.2 to 0.8 in steps of 0.1. Whenever the independent variable  $X$  was equal to 0, we  
285 sampled the dependent variable  $Y$  either from distribution D0 or D7 (see Table 1). We also introduced  
286 a third distribution D7.1, which was negative binomial with mean 0.5 and a variance of 1 (with the  
287 rational of introducing the same absolute difference in variance as in D0). Whenever the independent  
288 variable  $X$  was equal to 1, we sampled the dependent variable from the same distribution but with a  
289 10-times larger variance. We assessed the effects of heteroscedasticity with sample sizes of  $N = 100$   
290 and  $N = 1000$ . We then fitted a glm either with a Gaussian or a Quasipoisson error structure, where we  
291 tested the significance of the independent variable  $X$  via a likelihood ratio test. We fitted these models  
292 to 50,000 datasets for each combination of the dependent and predictor variable with two sample sizes  
293 (i.e. 3 distribution of the dependent variable  $\times$  7 distributions of the independent variable  $\times$  2 sample  
294 sizes = 42 combinations, each with a Gaussian or a Quasipoisson error structure).

295  
296 Second, we introduced a second independent variable  $X$  that we sampled from a uniform distribution  
297 with five levels. The other predictor and the dependent variable  $Y$  were sampled as described above  
298 with sample sizes of  $N = 100$  and  $N = 1000$ . We then fitted a glm either with a Gaussian or a  
299 Quasipoisson error structure, where we tested the significance of the interaction between the two  
300 independent variables via a likelihood ratio test. We fitted these models to 50,000 datasets for each  
301 combination of the dependent and predictor variables with two sample sizes as well.

302  
303 For each simulation run, we recorded the variance in the two groups (as defined by the predictor  
304 variable with two levels, see above). We summarized the 50,000 simulation runs by calculating (1)  
305 the type I error rate as the number of simulations with a  $P$ -value  $\leq 0.05$  / the number of all simulation  
306 runs (i.e. 50,000) and (2) the mean observed difference in variances between the two groups (see  
307 Table S5).



## 308 **Supplementary Figures**

309

310 **Figure S1** | All simulated combinations of the dependent variable  $Y$  and the predictor  $X$  that were  
311 fitted in linear regression models for sample sizes  $N = 10, 25, 50, 100, 250, 500, 1000$ . Figure names  
312 are constructed as “ $X$ ” <Distribution name of  $X$ > “\_ $Y$ ” <How many distributions of  $Y$ >  
313 “Distributions\_ $N$ ” <Sample size> “\_Sim” <Number of simulation runs>, such that the file  
314 “XD0\_Y10Distributions\_N10\_Sim50000” shows results from all 50,000 simulation runs where the  
315 predictor  $X$  was normally distributed, the independent variable  $Y$  had ten different distributions (D0–  
316 D9) and the sample size was  $N = 10$ . In each of the  $7 \times 10 = 70$  figures, the leftmost column depicts  
317 the distribution of  $Y$ , the second column depicts the distribution of  $X$ , the third column a QQ-plot of  
318 the residuals and the forth column a QQ-plot of the  $-\log_{10}(P\text{-values})$ . Residuals were distributed as the  
319 dependent variable  $Y$  because the regression coefficient  $b$  was on average zero.

320

321 *Provided as supplementary figures (.jpg) on the Open Science Framework homepage.*

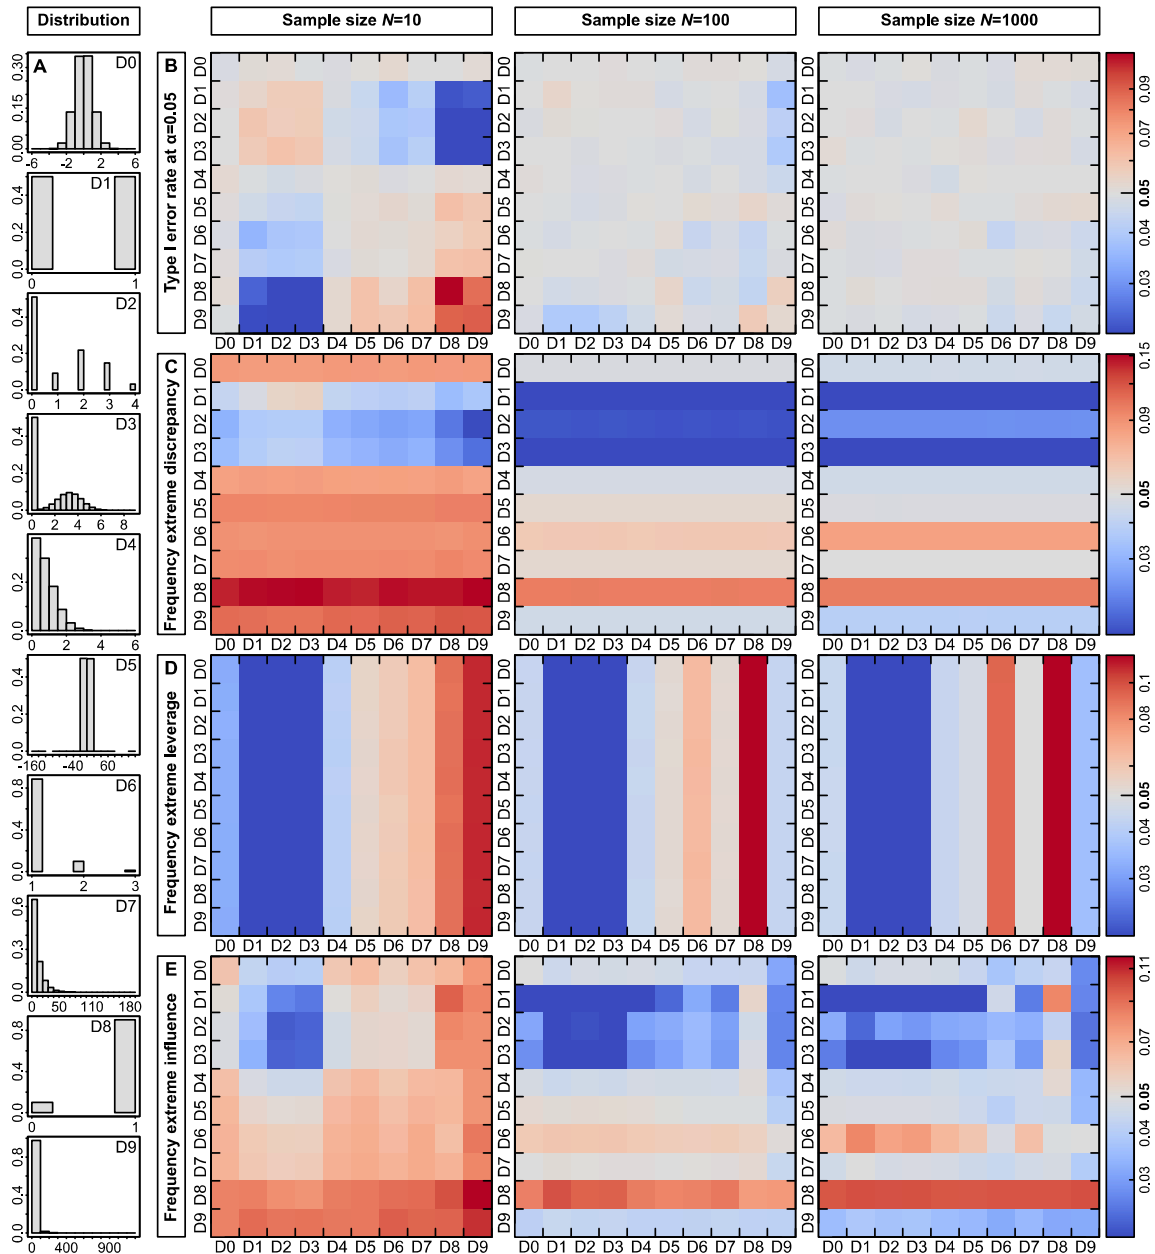

322  
323

324 **Figure S2** | Summary of linear model diagnostics for all  $10 \times 10 = 100$  combinations of the dependent  
 325 variable  $Y$  and the predictor  $X$  depicted in (A). The numbers D0–D9 refer to the plots in in (B–E)  
 326 where on the  $Y$ -axis the distribution of the dependent variable and on the  $X$ -axis of the predictor is  
 327 indicated. (B) Type I error rate at an  $\alpha$ -level of 0.05 for sample sizes of  $N = 10, 100$  and  $1000$ . Red  
 328 colours represent increased and blue conservative type I error rates. (C) Mean proportion of  
 329 studentized residuals ( $R$ ) exceeding the critical value of  $R > 2$  as a measure of discrepancy. A large  
 330 discrepancy value represents an observation whose dependent variable  $Y$  is unusual given its value of  
 331 the predictor  $X$ . It is thus influenced predominately by the distribution of  $Y$ . (D) Mean proportion of  
 332 hat values ( $H$ ) exceeding the critical value of  $H > (2 \times (k + 1)) / n$  as a measure of leverage.  $k$  is the  
 333 number of regression slopes and  $n$  is the number of observations. A large leverage value represents an  
 334 observation whose predictor  $X$  is unusual given its value of the independent variable  $Y$ . It is thus  
 335 influenced predominately by the distribution of  $X$ . (E) Mean proportion of Cook’s distance ( $D$ )  
 336 exceeding the critical value of  $D > 4 / (n - k - 1)$  as a measure of influence. Influence represents the  
 337 product of discrepancy and leverage (Zuur, Ieno & Smith 2007; Ramsey & Schafer 2013).

338 **Figure S3** | All simulated combinations of the dependent variable  $Y$  and the last of four predictors  $X$   
339 that were fitted in linear regression models. The first three predictors were normally distributed and  
340 the distribution of the last one was varied. The sample size was  $N = 100$ . For a description of file  
341 names and content see Figure S1.

342

343 *Provided as supplementary figures (.jpg) on the Open Science Framework homepage.*

344 **Figure S4** | All simulated combinations of the dependent variable  $Y$  and the predictor  $X$  fitted in linear  
345 random-intercept models. We simulated  $N = 100$  independent samples each of which was sampled  
346 twice, such that the single random effect explained roughly 30% of the variation in  $Y$ . For a  
347 description of file names and content see Figure S1.

348

349 *Provided as supplementary figures (.jpg) on the Open Science Framework homepage.*

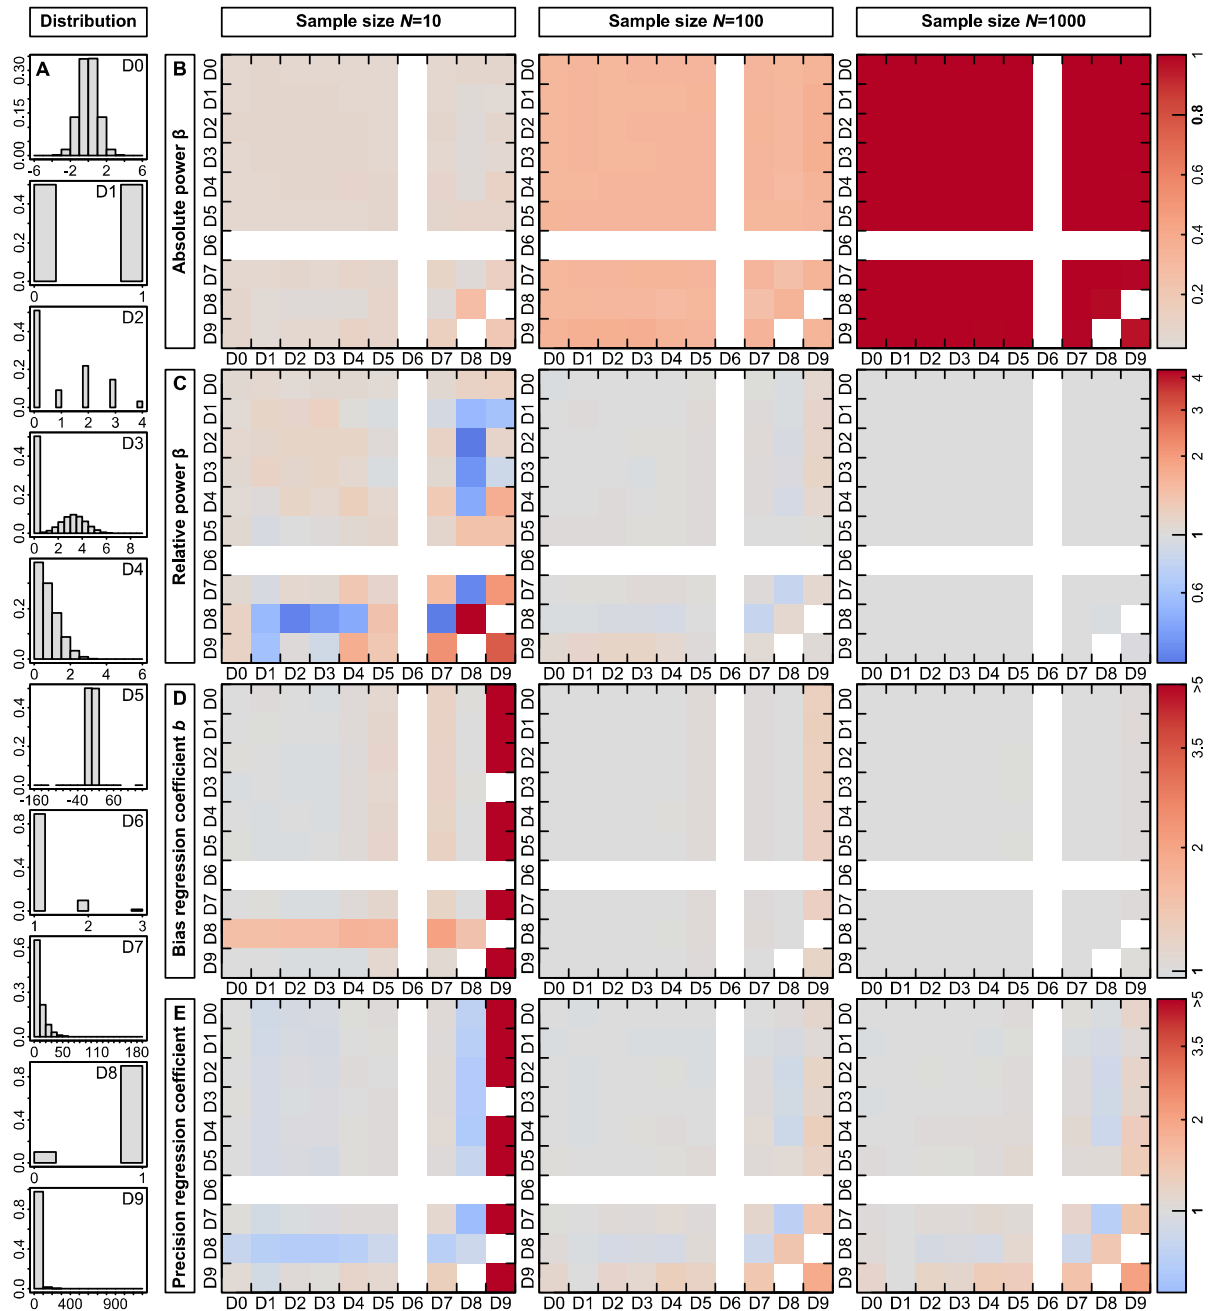

350  
351

352 **Figure S5** | Power, bias and precision of parameter estimates from Gaussian linear regression models  
 353 for all  $10 \times 10 = 100$  combinations of the dependent variable  $Y$  and the predictor  $X$  at a regression  
 354 coefficient  $b = 0.15$ . **(A)** Overview of the different distributions that we simulated, which were the  
 355 same as in Figure 1. The numbers D0–D9 refer to the plots in **(B–E)** where on the  $Y$ -axis the  
 356 distribution of the dependent variable and on the  $X$ -axis of the predictor is indicated. **(B)** Power for  
 357 sample sizes of  $N = 10, 100$  and  $1000$ . Red colours represent increased power. **(C)** Deviation of power  
 358 from the expected value derived from a normally distributed  $Y$  and  $X$  for sample sizes of  $N = 10, 100$   
 359 and  $1000$ . Red colours represent increased and blue colours decreased power. **(D)** Bias and **(E)**  
 360 precision of the regression coefficient estimates for sample sizes of  $N = 10, 100$  and  $1000$ .

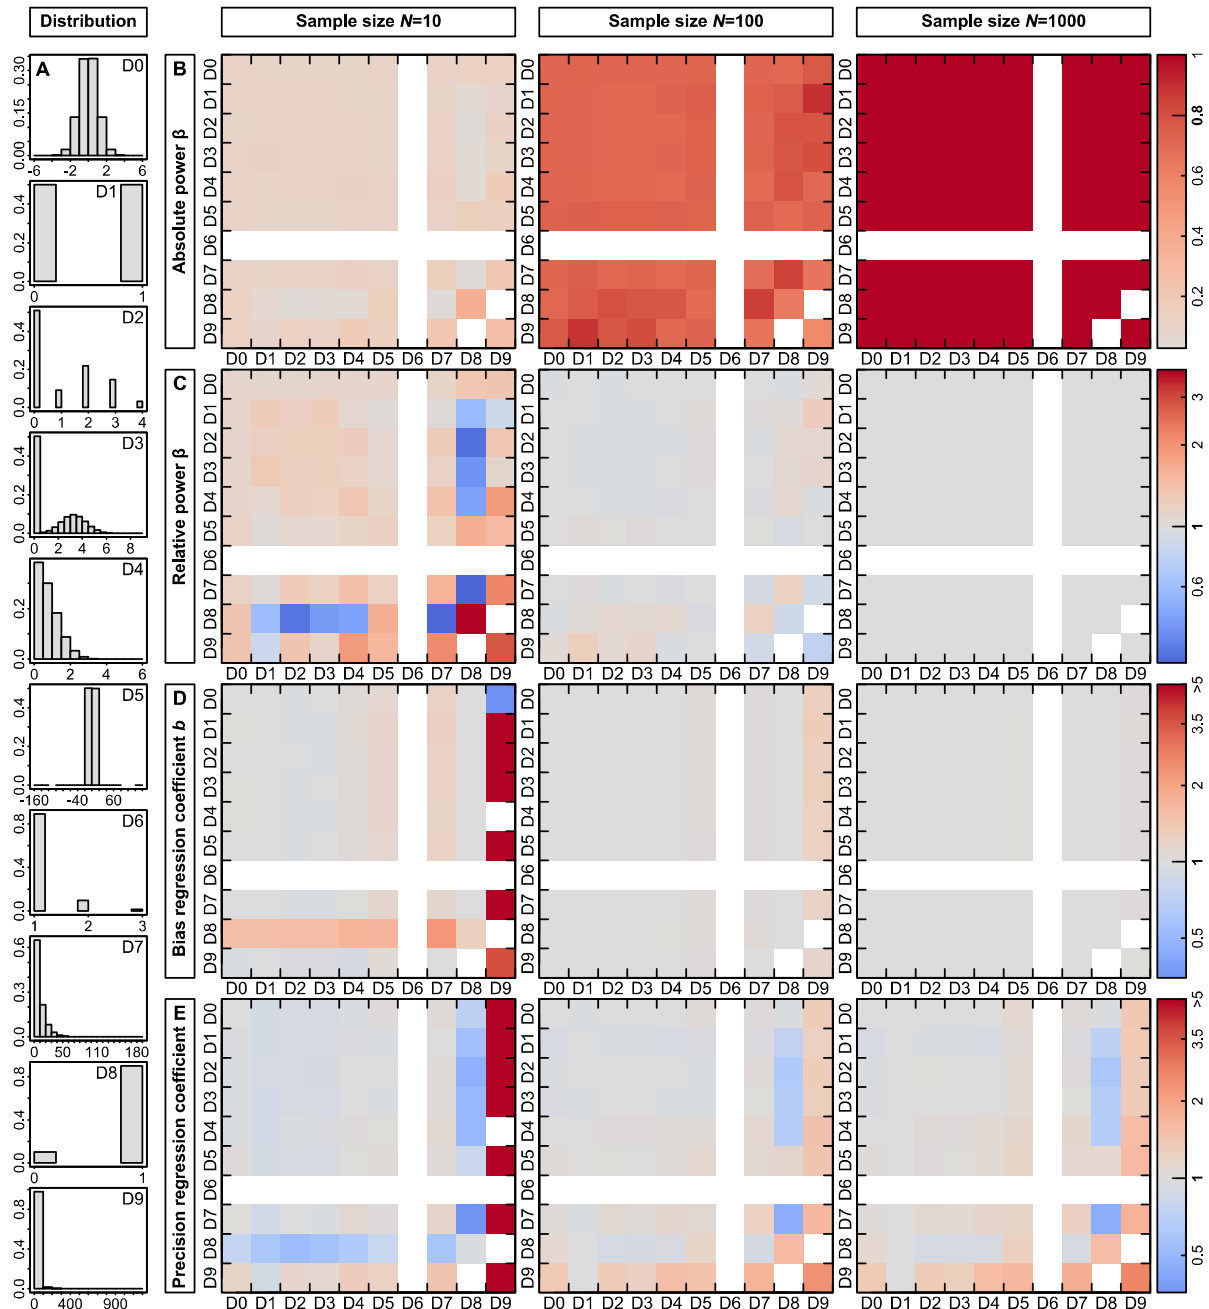

361  
362

363 **Figure S6** | Power, bias and precision of parameter estimates from Gaussian linear regression models  
 364 for all  $10 \times 10 = 100$  combinations of the dependent variable  $Y$  and the predictor  $X$  at a regression  
 365 coefficient  $b = 0.25$ . (A) Overview of the different distributions that we simulated, which were the  
 366 same as in Figure 1. The numbers D0–D9 refer to the plots in (B–E) where on the  $Y$ -axis the  
 367 distribution of the dependent variable and on the  $X$ -axis of the predictor is indicated. (B) Power for  
 368 sample sizes of  $N = 10, 100$  and  $1000$ . Red colours represent increased power. (C) Deviation of power  
 369 from the expected value derived from a normally distributed  $Y$  and  $X$  for sample sizes of  $N = 10, 100$   
 370 and  $1000$ . Red colours represent increased and blue colours decreased power. (D) Bias and (E)  
 371 precision of the regression coefficient estimates for sample sizes of  $N = 10, 100$  and  $1000$ .

372 **Figure S7** | All simulated combinations of the dependent variable  $Y$  and the predictor  $X$  fitted in  
373 generalized linear models with a Poisson error structure. The sample size was  $N = 100$ . For a  
374 description of file names and content see Figure S1.

375

376 *Provided as supplementary figures (.jpg) on the Open Science Framework homepage.*

377 **Supplementary Tables**

378

379 **Table S1** | Observed and expected power of a regression model in which both the dependent variable

380  $Y$  and the predictor  $X$  are normally distributed with mean 0 and standard deviation 1. The expected

381 power was calculated using the `power.SLR()` function from the `powerMediation` R package (v0.2.9,

382 Dupont & Plummer 1998; Qiu 2018). The observed power was estimated using 50,000 simulations.

383

| Sample size | Mean of slope $b$ | Expected power at $\alpha = 0.05$ | Expected power at $\alpha = 0.001$ | Observed power at $\alpha = 0.05$ | Observed power at $\alpha = 0.001$ |
|-------------|-------------------|-----------------------------------|------------------------------------|-----------------------------------|------------------------------------|
| 10          | 0.15              | 0.064                             | $1.20 \times 10^{-3}$              | 0.069                             | $1.48 \times 10^{-3}$              |
| 10          | 0.20              | 0.077                             | $1.38 \times 10^{-3}$              | 0.084                             | $2.26 \times 10^{-3}$              |
| 10          | 0.25              | 0.094                             | $1.64 \times 10^{-3}$              | 0.106                             | $3.44 \times 10^{-3}$              |
| 100         | 0.15              | 0.321                             | 0.032                              | 0.316                             | 0.034                              |
| 100         | 0.20              | 0.523                             | 0.090                              | 0.517                             | 0.095                              |
| 100         | 0.25              | 0.724                             | 0.210                              | 0.714                             | 0.218                              |
| 1000        | 0.15              | 0.998                             | 0.933                              | 0.998                             | 0.932                              |
| 1000        | 0.20              | 1.000                             | 0.999                              | 1.000                             | 0.999                              |
| 1000        | 0.25              | 1.000                             | 1.000                              | 1.000                             | 1.000                              |



384 **Table S2** | Distributions and effect sizes used for assessing the interpretability and power of Gaussian  
 385 versus binomial and Poisson models at a sample size of  $N = 100$  in 50,000 simulation runs. Each  
 386 combination of the dependent variable  $Y$  and predictor  $X$  was fitted in a glm using a Gaussian error  
 387 structure and the appropriate error structure according to the distribution of  $Y$ . The effect sizes were  
 388 chosen such that we reached a power of around 0.5.  
 389

| <b>Sampling distribution <math>Y</math></b> | <b>Sampling distribution <math>X</math></b> | <b>Mean <math>Y</math></b> | <b>Variance <math>Y</math></b> | <b>Mean <math>X</math></b> | <b>Variance <math>X</math></b> | <b>Effect</b> | <b>Back-transformed effect<sup>#</sup></b> |
|---------------------------------------------|---------------------------------------------|----------------------------|--------------------------------|----------------------------|--------------------------------|---------------|--------------------------------------------|
| Poisson                                     | Gaussian                                    | 1                          | 1                              | 0                          | 1                              | 0.2           | 1.22                                       |
| Poisson                                     | Gamma                                       | 1                          | 1                              | 10                         | 100                            | 2.2           | 9.03                                       |
| Poisson                                     | Binomial                                    | 1                          | 1                              | 0.75                       | 0.19                           | 0.1           | 1.11                                       |
| Binomial                                    | Gaussian                                    | 0.75                       | 0.19                           | 0                          | 1                              | 0.45          | 0.61                                       |
| Binomial                                    | Gamma                                       | 0.75                       | 0.19                           | 10                         | 100                            | 4.2           | 0.99                                       |
| Binomial                                    | Binomial                                    | 0.75                       | 0.19                           | 0.75                       | 0.19                           | 0.2           | 0.55                                       |

390 # Back-transformation was done by using the functions `plogis()` for binomial models and `exp()` for Poisson models.

391 **Table S3** | Summary of type I error rates ( $\alpha$ ), scale shift parameters ( $\nu$ ), mean observed  $P$ -values at an expected value of  $10^{-3}$  and  $10^{-4}$  and the resulting bias  
 392 from 50,000 simulation runs across all  $10 \times 10 = 100$  combinations of the dependent variable  $Y$  and the predictor  $X$ .  
 393

| Sample size | Mean $\alpha$ (range) | Mean $\nu$ (range)   | Mean $P$ at $10^{-3}$ (range)                                              | Mean $P$ at $10^{-4}$ (range)                                              | Bias at $-\log_{10}P=3$ | Bias at $-\log_{10}P=4$ |
|-------------|-----------------------|----------------------|----------------------------------------------------------------------------|----------------------------------------------------------------------------|-------------------------|-------------------------|
| 10          | 0.048 (0.015–0.110)   | 2.437 (0.696–51.350) | $7.72 \times 10^{-12}$ ( $2.59 \times 10^{-125}$ – $7.00 \times 10^{-3}$ ) | $7.96 \times 10^{-21}$ ( $6.31 \times 10^{-129}$ – $1.05 \times 10^{-3}$ ) | 3.704 (0.718–41.529)    | 5.025 (0.744–32.050)    |
| 25          | 0.048 (0.019–0.073)   | 1.065 (0.771–2.461)  | $1.96 \times 10^{-4}$ ( $2.20 \times 10^{-16}$ – $7.93 \times 10^{-3}$ )   | $3.25 \times 10^{-6}$ ( $6.81 \times 10^{-27}$ – $1.57 \times 10^{-3}$ )   | 1.236 (0.700–5.219)     | 1.372 (0.701–6.542)     |
| 50          | 0.048 (0.028–0.067)   | 1.043 (0.837–2.229)  | $3.64 \times 10^{-4}$ ( $5.36 \times 10^{-13}$ – $6.47 \times 10^{-3}$ )   | $5.94 \times 10^{-6}$ ( $3.55 \times 10^{-23}$ – $1.27 \times 10^{-3}$ )   | 1.146 (0.730–4.090)     | 1.307 (0.724–5.612)     |
| 100         | 0.049 (0.037–0.058)   | 1.026 (0.892–1.937)  | $5.04 \times 10^{-4}$ ( $8.22 \times 10^{-11}$ – $4.55 \times 10^{-3}$ )   | $1.76 \times 10^{-5}$ ( $7.14 \times 10^{-19}$ – $1.45 \times 10^{-3}$ )   | 1.099 (0.781–3.362)     | 1.188 (0.710–4.537)     |
| 250         | 0.049 (0.041–0.053)   | 1.020 (0.941–1.631)  | $5.81 \times 10^{-4}$ ( $2.49 \times 10^{-9}$ – $3.00 \times 10^{-3}$ )    | $2.16 \times 10^{-5}$ ( $2.14 \times 10^{-15}$ – $3.31 \times 10^{-4}$ )   | 1.079 (0.841–2.868)     | 1.166 (0.870–3.667)     |
| 500         | 0.049 (0.045–0.052)   | 1.014 (0.958–1.534)  | $6.57 \times 10^{-4}$ ( $9.12 \times 10^{-9}$ – $2.02 \times 10^{-3}$ )    | $3.12 \times 10^{-5}$ ( $1.87 \times 10^{-16}$ – $7.07 \times 10^{-4}$ )   | 1.061 (0.898–2.680)     | 1.126 (0.788–3.932)     |
| 1000        | 0.049 (0.044–0.052)   | 1.010 (0.977–1.343)  | $7.51 \times 10^{-4}$ ( $6.35 \times 10^{-7}$ – $1.52 \times 10^{-3}$ )    | $3.94 \times 10^{-5}$ ( $1.29 \times 10^{-14}$ – $2.52 \times 10^{-4}$ )   | 1.042 (0.939–2.066)     | 1.101 (0.899–3.473)     |

394  
395  
396

**Table S4** | Summary of type I error rates ( $\alpha$ ), scale shift parameters ( $\nu$ ), mean observed  $P$ -values at an expected value of  $10^{-3}$  and  $10^{-4}$  and the resulting bias from 50,000 simulation runs across all  $10 \times 2 = 20$  combinations where either the dependent variable  $Y$  or the predictor  $X$  was normally distributed.

| Normally distributed variable | Sample size | Mean $\alpha$ (range) | Mean $\nu$ (range)  | Mean $P$ at $10^{-3}$ (range)                                           | Mean $P$ at $10^{-4}$ (range)                                           | Bias at $-\log_{10}P=3$ | Bias at $-\log_{10}P=4$ |
|-------------------------------|-------------|-----------------------|---------------------|-------------------------------------------------------------------------|-------------------------------------------------------------------------|-------------------------|-------------------------|
| Y                             | 10          | 0.050 (0.048–0.052)   | 1.005 (0.997–1.015) | $8.82 \times 10^{-4}$ ( $6.64 \times 10^{-4}$ – $1.03 \times 10^{-3}$ ) | $8.43 \times 10^{-5}$ ( $4.01 \times 10^{-5}$ – $1.55 \times 10^{-4}$ ) | 1.018 (0.996–1.059)     | 1.019 (0.952–1.099)     |
| Y                             | 25          | 0.050 (0.049–0.052)   | 1.004 (0.990–1.015) | $9.90 \times 10^{-4}$ ( $7.92 \times 10^{-4}$ – $1.22 \times 10^{-3}$ ) | $6.25 \times 10^{-5}$ ( $3.19 \times 10^{-5}$ – $1.17 \times 10^{-4}$ ) | 1.002 (0.971–1.034)     | 1.051 (0.983–1.124)     |
| Y                             | 50          | 0.050 (0.049–0.051)   | 0.999 (0.992–1.015) | $1.02 \times 10^{-3}$ ( $8.06 \times 10^{-4}$ – $1.32 \times 10^{-3}$ ) | $9.14 \times 10^{-5}$ ( $4.79 \times 10^{-5}$ – $1.55 \times 10^{-4}$ ) | 0.997 (0.960–1.031)     | 1.010 (0.952–1.080)     |
| Y                             | 100         | 0.050 (0.048–0.051)   | 1.000 (0.993–1.005) | $1.02 \times 10^{-3}$ ( $8.90 \times 10^{-4}$ – $1.25 \times 10^{-3}$ ) | $8.22 \times 10^{-5}$ ( $5.90 \times 10^{-5}$ – $1.32 \times 10^{-4}$ ) | 0.998 (0.968–1.017)     | 1.021 (0.970–1.057)     |
| Y                             | 250         | 0.050 (0.048–0.051)   | 1.001 (0.990–1.014) | $9.66 \times 10^{-4}$ ( $7.49 \times 10^{-4}$ – $1.22 \times 10^{-3}$ ) | $8.29 \times 10^{-5}$ ( $3.77 \times 10^{-5}$ – $1.61 \times 10^{-4}$ ) | 1.005 (0.972–1.042)     | 1.020 (0.949–1.106)     |
| Y                             | 500         | 0.049 (0.047–0.051)   | 0.998 (0.984–1.003) | $9.95 \times 10^{-4}$ ( $7.62 \times 10^{-4}$ – $1.28 \times 10^{-3}$ ) | $8.39 \times 10^{-5}$ ( $4.20 \times 10^{-5}$ – $1.79 \times 10^{-4}$ ) | 1.001 (0.965–1.039)     | 1.019 (0.937–1.094)     |
| Y                             | 1000        | 0.050 (0.049–0.052)   | 0.999 (0.989–1.017) | $1.06 \times 10^{-3}$ ( $8.99 \times 10^{-4}$ – $1.36 \times 10^{-3}$ ) | $8.47 \times 10^{-5}$ ( $5.86 \times 10^{-5}$ – $1.44 \times 10^{-4}$ ) | 0.992 (0.956–1.015)     | 1.018 (0.960–1.058)     |
| X                             | 10          | 0.050 (0.048–0.052)   | 1.003 (0.996–1.014) | $9.28 \times 10^{-4}$ ( $7.59 \times 10^{-4}$ – $1.24 \times 10^{-3}$ ) | $9.76 \times 10^{-5}$ ( $5.62 \times 10^{-5}$ – $1.46 \times 10^{-4}$ ) | 1.011 (0.968–1.040)     | 1.003 (0.959–1.063)     |
| X                             | 25          | 0.050 (0.049–0.051)   | 0.999 (0.988–1.010) | $1.11 \times 10^{-3}$ ( $8.45 \times 10^{-4}$ – $1.42 \times 10^{-3}$ ) | $9.73 \times 10^{-5}$ ( $5.31 \times 10^{-5}$ – $1.69 \times 10^{-4}$ ) | 0.986 (0.949–1.024)     | 1.003 (0.943–1.069)     |
| X                             | 50          | 0.049 (0.048–0.052)   | 0.998 (0.988–1.017) | $1.01 \times 10^{-3}$ ( $7.53 \times 10^{-4}$ – $1.27 \times 10^{-3}$ ) | $1.35 \times 10^{-4}$ ( $7.49 \times 10^{-5}$ – $2.03 \times 10^{-4}$ ) | 0.998 (0.965–1.041)     | 0.968 (0.923–1.031)     |
| X                             | 100         | 0.050 (0.048–0.051)   | 1.001 (0.996–1.005) | $9.98 \times 10^{-4}$ ( $8.04 \times 10^{-4}$ – $1.20 \times 10^{-3}$ ) | $7.64 \times 10^{-5}$ ( $2.39 \times 10^{-5}$ – $1.81 \times 10^{-4}$ ) | 1.000 (0.973–1.032)     | 1.029 (0.936–1.155)     |
| X                             | 250         | 0.050 (0.049–0.052)   | 1.004 (0.995–1.016) | $9.69 \times 10^{-4}$ ( $7.49 \times 10^{-4}$ – $1.25 \times 10^{-3}$ ) | $6.74 \times 10^{-5}$ ( $2.72 \times 10^{-5}$ – $1.46 \times 10^{-4}$ ) | 1.005 (0.968–1.042)     | 1.043 (0.959–1.141)     |
| X                             | 500         | 0.050 (0.049–0.052)   | 1.000 (0.989–1.014) | $9.67 \times 10^{-4}$ ( $7.99 \times 10^{-4}$ – $1.16 \times 10^{-3}$ ) | $1.15 \times 10^{-4}$ ( $5.19 \times 10^{-5}$ – $1.84 \times 10^{-4}$ ) | 1.005 (0.979–1.033)     | 0.985 (0.934–1.071)     |
| X                             | 1000        | 0.050 (0.049–0.052)   | 1.000 (0.992–1.012) | $1.02 \times 10^{-3}$ ( $7.48 \times 10^{-4}$ – $1.30 \times 10^{-3}$ ) | $6.92 \times 10^{-5}$ ( $1.91 \times 10^{-5}$ – $1.38 \times 10^{-4}$ ) | 0.997 (0.962–1.042)     | 1.040 (0.965–1.180)     |

397 **Table S5** | Summary of the heteroscedasticity simulations. We estimated type I error rates ( $\alpha$ ) in glms  
398 with a Gaussian or Quasipoisson error structure and the mean observed difference in variances  
399 between the two groups as defined by the predictor variable with two levels (see Supplementary  
400 Methods for details, expected value is 10).  
401

| Model        | Sampling distribution Y | P( $X_I=1$ ) | Sample size | Gaussian $\alpha$     | Quasipoisson $\alpha$ | Observed difference in variances |
|--------------|-------------------------|--------------|-------------|-----------------------|-----------------------|----------------------------------|
| $Y \sim X_I$ | D0                      | 0.2          | 100         | $1.18 \times 10^{-3}$ | -                     | 11.21                            |
| $Y \sim X_I$ | D0                      | 0.3          | 100         | $7.70 \times 10^{-3}$ | -                     | 10.75                            |
| $Y \sim X_I$ | D0                      | 0.4          | 100         | 0.024                 | -                     | 10.53                            |
| $Y \sim X_I$ | D0                      | 0.5          | 100         | 0.054                 | -                     | 10.41                            |
| $Y \sim X_I$ | D0                      | 0.6          | 100         | 0.101                 | -                     | 10.35                            |
| $Y \sim X_I$ | D0                      | 0.7          | 100         | 0.168                 | -                     | 10.31                            |
| $Y \sim X_I$ | D0                      | 0.8          | 100         | 0.262                 | -                     | 10.24                            |
| $Y \sim X_I$ | D7                      | 0.2          | 100         | 0.037                 | 0.024                 | 14.46                            |
| $Y \sim X_I$ | D7                      | 0.3          | 100         | 0.063                 | 0.047                 | 12.78                            |
| $Y \sim X_I$ | D7                      | 0.4          | 100         | 0.096                 | 0.080                 | 11.97                            |
| $Y \sim X_I$ | D7                      | 0.5          | 100         | 0.130                 | 0.121                 | 11.73                            |
| $Y \sim X_I$ | D7                      | 0.6          | 100         | 0.176                 | 0.180                 | 11.37                            |
| $Y \sim X_I$ | D7                      | 0.7          | 100         | 0.237                 | 0.256                 | 11.17                            |
| $Y \sim X_I$ | D7                      | 0.8          | 100         | 0.319                 | 0.356                 | 10.95                            |
| $Y \sim X_I$ | D7.1                    | 0.2          | 100         | 0.110                 | 0.079                 | 19.21                            |
| $Y \sim X_I$ | D7.1                    | 0.3          | 100         | 0.145                 | 0.119                 | 15.86                            |
| $Y \sim X_I$ | D7.1                    | 0.4          | 100         | 0.177                 | 0.158                 | 14.39                            |
| $Y \sim X_I$ | D7.1                    | 0.5          | 100         | 0.201                 | 0.199                 | 13.66                            |
| $Y \sim X_I$ | D7.1                    | 0.6          | 100         | 0.219                 | 0.244                 | 13.12                            |
| $Y \sim X_I$ | D7.1                    | 0.7          | 100         | 0.207                 | 0.283                 | 13.42                            |
| $Y \sim X_I$ | D7.1                    | 0.8          | 100         | 0.154                 | 0.298                 | 15.00                            |
| $Y \sim X_I$ | D0                      | 0.2          | 1000        | $5.4 \times 10^{-4}$  | -                     | 10.10                            |
| $Y \sim X_I$ | D0                      | 0.3          | 1000        | $6.68 \times 10^{-3}$ | -                     | 10.07                            |
| $Y \sim X_I$ | D0                      | 0.4          | 1000        | 0.022                 | -                     | 10.05                            |
| $Y \sim X_I$ | D0                      | 0.5          | 1000        | 0.050                 | -                     | 10.04                            |
| $Y \sim X_I$ | D0                      | 0.6          | 1000        | 0.097                 | -                     | 10.03                            |
| $Y \sim X_I$ | D0                      | 0.7          | 1000        | 0.166                 | -                     | 10.03                            |
| $Y \sim X_I$ | D0                      | 0.8          | 1000        | 0.250                 | -                     | 10.02                            |
| $Y \sim X_I$ | D7                      | 0.2          | 1000        | $4.34 \times 10^{-3}$ | $2.80 \times 10^{-3}$ | 10.39                            |
| $Y \sim X_I$ | D7                      | 0.3          | 1000        | 0.015                 | 0.012                 | 10.25                            |
| $Y \sim X_I$ | D7                      | 0.4          | 1000        | 0.031                 | 0.028                 | 10.20                            |
| $Y \sim X_I$ | D7                      | 0.5          | 1000        | 0.062                 | 0.059                 | 10.15                            |

|                    |      |     |      |                       |                       |       |
|--------------------|------|-----|------|-----------------------|-----------------------|-------|
| $Y \sim X_1$       | D7   | 0.6 | 1000 | 0.109                 | 0.108                 | 10.13 |
| $Y \sim X_1$       | D7   | 0.7 | 1000 | 0.174                 | 0.176                 | 10.09 |
| $Y \sim X_1$       | D7   | 0.8 | 1000 | 0.265                 | 0.270                 | 10.11 |
| $Y \sim X_1$       | D7.1 | 0.2 | 1000 | 0.015                 | $8.56 \times 10^{-3}$ | 10.74 |
| $Y \sim X_1$       | D7.1 | 0.3 | 1000 | 0.030                 | 0.021                 | 10.49 |
| $Y \sim X_1$       | D7.1 | 0.4 | 1000 | 0.056                 | 0.046                 | 10.38 |
| $Y \sim X_1$       | D7.1 | 0.5 | 1000 | 0.089                 | 0.081                 | 10.24 |
| $Y \sim X_1$       | D7.1 | 0.6 | 1000 | 0.132                 | 0.131                 | 10.19 |
| $Y \sim X_1$       | D7.1 | 0.7 | 1000 | 0.197                 | 0.203                 | 10.17 |
| $Y \sim X_1$       | D7.1 | 0.8 | 1000 | 0.288                 | 0.299                 | 10.21 |
| $Y \sim X_1 * X_2$ | D0   | 0.2 | 100  | $1.2 \times 10^{-4}$  | -                     | 11.23 |
| $Y \sim X_1 * X_2$ | D0   | 0.3 | 100  | $2.42 \times 10^{-3}$ | -                     | 10.76 |
| $Y \sim X_1 * X_2$ | D0   | 0.4 | 100  | 0.017                 | -                     | 10.58 |
| $Y \sim X_1 * X_2$ | D0   | 0.5 | 100  | 0.064                 | -                     | 10.47 |
| $Y \sim X_1 * X_2$ | D0   | 0.6 | 100  | 0.169                 | -                     | 10.34 |
| $Y \sim X_1 * X_2$ | D0   | 0.7 | 100  | 0.340                 | -                     | 10.29 |
| $Y \sim X_1 * X_2$ | D0   | 0.8 | 100  | 0.559                 | -                     | 10.27 |
| $Y \sim X_1 * X_2$ | D7   | 0.2 | 100  | $4.26 \times 10^{-3}$ | $9.20 \times 10^{-3}$ | 14.52 |
| $Y \sim X_1 * X_2$ | D7   | 0.3 | 100  | $7.40 \times 10^{-3}$ | 0.036                 | 12.83 |
| $Y \sim X_1 * X_2$ | D7   | 0.4 | 100  | 0.019                 | 0.097                 | 12.09 |
| $Y \sim X_1 * X_2$ | D7   | 0.5 | 100  | 0.047                 | 0.206                 | 11.58 |
| $Y \sim X_1 * X_2$ | D7   | 0.6 | 100  | 0.108                 | 0.353                 | 11.26 |
| $Y \sim X_1 * X_2$ | D7   | 0.7 | 100  | 0.209                 | 0.492                 | 11.07 |
| $Y \sim X_1 * X_2$ | D7   | 0.8 | 100  | 0.321                 | 0.557                 | 11.09 |
| $Y \sim X_1 * X_2$ | D7.1 | 0.2 | 100  | 0.049                 | 0.084                 | 20.10 |
| $Y \sim X_1 * X_2$ | D7.1 | 0.3 | 100  | 0.042                 | 0.147                 | 15.97 |
| $Y \sim X_1 * X_2$ | D7.1 | 0.4 | 100  | 0.036                 | 0.217                 | 14.06 |
| $Y \sim X_1 * X_2$ | D7.1 | 0.5 | 100  | 0.044                 | 0.293                 | 13.57 |
| $Y \sim X_1 * X_2$ | D7.1 | 0.6 | 100  | 0.080                 | 0.357                 | 13.20 |
| $Y \sim X_1 * X_2$ | D7.1 | 0.7 | 100  | 0.150                 | 0.381                 | 13.50 |
| $Y \sim X_1 * X_2$ | D7.1 | 0.8 | 100  | 0.251                 | 0.368                 | 15.17 |
| $Y \sim X_1 * X_2$ | D0   | 0.2 | 1000 | $2 \times 10^{-5}$    | -                     | 10.11 |
| $Y \sim X_1 * X_2$ | D0   | 0.3 | 1000 | $1.00 \times 10^{-3}$ | -                     | 10.07 |
| $Y \sim X_1 * X_2$ | D0   | 0.4 | 1000 | 0.011                 | -                     | 10.05 |
| $Y \sim X_1 * X_2$ | D0   | 0.5 | 1000 | 0.051                 | -                     | 10.04 |
| $Y \sim X_1 * X_2$ | D0   | 0.6 | 1000 | 0.146                 | -                     | 10.03 |
| $Y \sim X_1 * X_2$ | D0   | 0.7 | 1000 | 0.306                 | -                     | 10.02 |
| $Y \sim X_1 * X_2$ | D0   | 0.8 | 1000 | 0.526                 | -                     | 10.04 |

|                    |      |     |      |                       |                       |       |
|--------------------|------|-----|------|-----------------------|-----------------------|-------|
| $Y \sim X_1 * X_2$ | D7   | 0.2 | 1000 | $4 \times 10^{-5}$    | $1.4 \times 10^{-4}$  | 10.42 |
| $Y \sim X_1 * X_2$ | D7   | 0.3 | 1000 | $1.24 \times 10^{-3}$ | $3.24 \times 10^{-3}$ | 10.25 |
| $Y \sim X_1 * X_2$ | D7   | 0.4 | 1000 | $9.82 \times 10^{-3}$ | 0.020                 | 10.21 |
| $Y \sim X_1 * X_2$ | D7   | 0.5 | 1000 | 0.046                 | 0.077                 | 10.16 |
| $Y \sim X_1 * X_2$ | D7   | 0.6 | 1000 | 0.136                 | 0.195                 | 10.13 |
| $Y \sim X_1 * X_2$ | D7   | 0.7 | 1000 | 0.297                 | 0.379                 | 10.09 |
| $Y \sim X_1 * X_2$ | D7   | 0.8 | 1000 | 0.509                 | 0.596                 | 10.06 |
| $Y \sim X_1 * X_2$ | D7.1 | 0.2 | 1000 | $1.4 \times 10^{-4}$  | $1.12 \times 10^{-3}$ | 10.71 |
| $Y \sim X_1 * X_2$ | D7.1 | 0.3 | 1000 | $1.26 \times 10^{-3}$ | 0.010                 | 10.49 |
| $Y \sim X_1 * X_2$ | D7.1 | 0.4 | 1000 | $8.78 \times 10^{-3}$ | 0.046                 | 10.34 |
| $Y \sim X_1 * X_2$ | D7.1 | 0.5 | 1000 | 0.037                 | 0.128                 | 10.34 |
| $Y \sim X_1 * X_2$ | D7.1 | 0.6 | 1000 | 0.115                 | 0.278                 | 10.24 |
| $Y \sim X_1 * X_2$ | D7.1 | 0.7 | 1000 | 0.259                 | 0.482                 | 10.25 |
| $Y \sim X_1 * X_2$ | D7.1 | 0.8 | 1000 | 0.449                 | 0.684                 | 10.19 |

---

402 **References**

- 403 Dupont, W.D. & Plummer, W.D. (1998) Power and sample size calculations for studies involving  
404 linear regression. *Controlled Clinical Trials*, **19**, 589–601.
- 405 Komsta, L. & Novomestky, F. (2015) moments: Moments, cumulants, skewness, kurtosis and related  
406 tests.
- 407 Lin, L.I. (1989) A concordance correlation-coefficient to evaluate reproducibility. *Biometrics*, **45**,  
408 255–268.
- 409 Qiu, W. (2018) powerMediation: Power/Sample Size Calculation for Mediation Analysis.
- 410 Ramsey, F. & Schafer, D.W. (2013) *The statistical sleuth: a course in methods of data analysis*, 3  
411 edn. Brooks/Cole.
- 412 Signorell, A. & mult. al. (2018) DescTools: Tools for descriptive statistics.
- 413 Zuur, A.K., Ieno, E.N. & Smith, G.M. (2007) *Analysing ecological data*. Springer Science + Business  
414 Media, LLC.
